# Supplementary material for: Efficient Retention and Alpha Spectroscopy of Actinides from Aqueous Solutions Using a Combination of Water-Soluble Star-like Polymers and Ultrafiltration Membranes
Source: MDPI journal article supplement (doi:10.3390/polym14173441), 2022-08-23
Supplement: s1 [file s1]

## Supplementary Materials

### **Efficient retention and alpha spectroscopy of actinides from aqueous solutions using a combination of water-soluble star-like polymers and ultrafiltration membranes**

Valery N. Bliznyuk<sup>1†\*</sup>, Nataliya V. Kutsevol<sup>2</sup>, Yuliia I. Kuziv<sup>2</sup>, Scott M. Husson<sup>3†</sup>, Timothy A. DeVol<sup>1†</sup>

<sup>1</sup> *Environmental Engineering and Earth Sciences, Clemson University, Anderson, SC 29625, USA*

<sup>2</sup> *Faculty of Chemistry, Taras Shevchenko National University of Kyiv, 60 Volodymyrska Street, 01601 Kyiv, Ukraine*

<sup>3</sup> *Chemical and Biomolecular Engineering, Clemson University, Clemson, SC 29634, USA*

<sup>†</sup> *Center for Nuclear Environmental Engineering Sciences and Radioactive Waste Management (NEESRWM) at Clemson University, Clemson SC 29634-0942 USA*

**Table S1.** The molecular parameters of star-like polymers DXX-PAAm.

| Sample   | $M_w \times 10^{-5}$ , g/mol | $R_z$ , nm |
|----------|------------------------------|------------|
| D20-PAA  | 8.5                          | 60         |
| D70-PAA  | 7.9                          | 52         |
| D500-PAA | 13.6                         | 67         |

**Table S2** Composition of  $^{242}\text{Pu}$  stock solution

| Isotope | Mass Fraction | Specific Activity [Ci/g] | Sample activity concentration [Ci/g] | Activity ratios normalized to Pu-242 | Type of decay, $E_\alpha$ [MeV] f(%) |
|---------|---------------|--------------------------|--------------------------------------|--------------------------------------|--------------------------------------|
| Pu-238  | 0.003         | 1.70E+01                 | 5.10E-04                             | 0.13                                 | 5.499 (71), 5.456 (29)               |
| Pu-239  | 0.005         | 6.20E-02                 | 3.10E-06                             | 7.95E-04                             | 5.157 (71), 5.144 (17), 5.105 (12)   |
| Pu-240  | 0.022         | 2.30E-01                 | 5.06E-05                             | 1.30E-02                             | 5.168 (73), 5.124 (27)               |
| Pu-241  | 0.006         | 1.00E+02                 | 6.00E-03                             | 1.54                                 | $\beta$ - decay                      |
| Pu-242  | 99.962        | 3.90E-03                 | 3.90E-03                             | 1.00                                 | 4.902 (76.5), 4.858 (23.5)           |
| Pu-244  | 0.002         | 1.80E-05                 | 3.60E-10                             | 9.23E-08                             | 4.589 (80.5), 4.546 (19.4)           |

$\text{PuO}_2$  solid we obtained from Oak Ridge in nitric acid (date 02/28/1980).

The amounts of  $^{241}\text{Pu}$  and  $^{238}\text{Pu}$  could significantly change since then.

$^{241}\text{Pu}$  decays to  $^{241}\text{Am}$  and then to  $^{237}\text{Np}$ .

$^{237}\text{Np}$   $\alpha$  energy: 4.788 MeV (47.64%), 4.771 MeV (23.2%), 4.7665 MeV (9.3%), 4.640 MeV (6.43%), 4.665 MeV (3.45%).

$^{241}\text{Am}$   $\alpha$  energy: 5.486 MeV (84%), 5.443 MeV (13%)

### Approach 1: Complexation then filtration and deposition on membrane

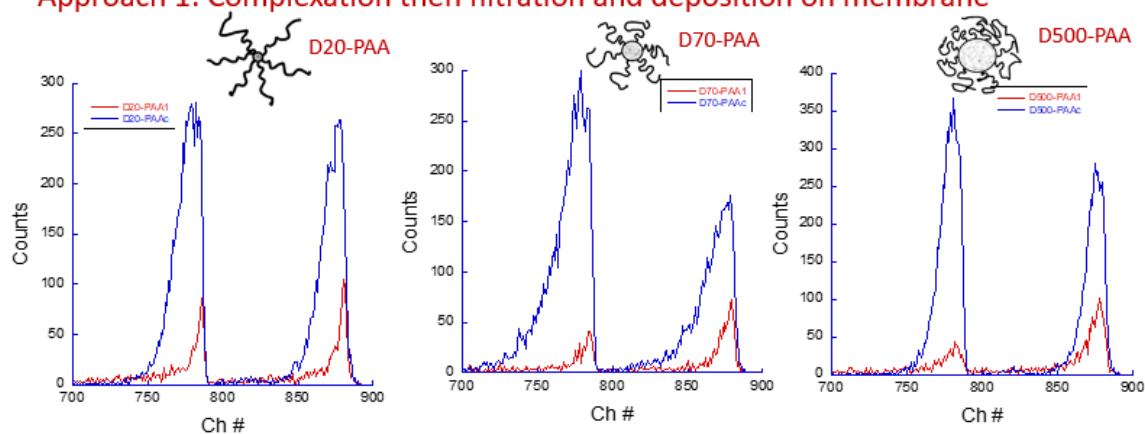

### Approach 2: Deposition of star-like polymer and then filtration

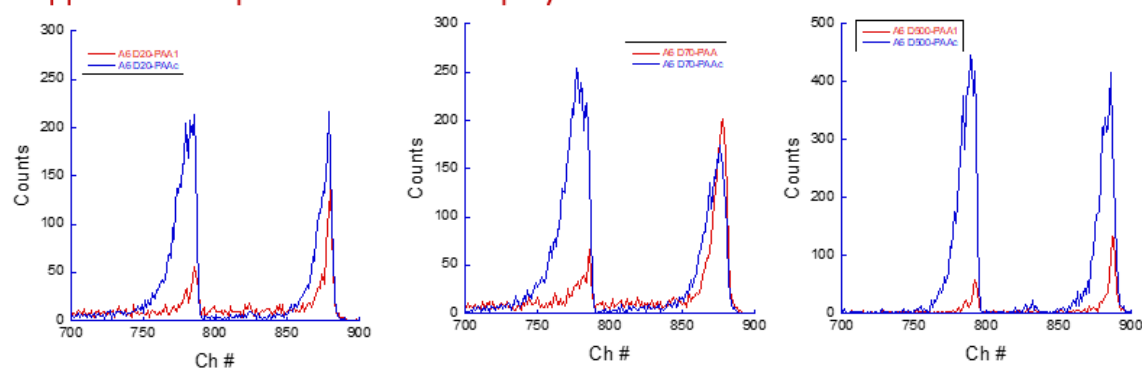

**Figure S1.** Alpha spectra of PVDF A6 membranes with polyacrylamide-Pu complexes during adsorption in Approach 1 and Approach 2.

**Table S3.** Calculated ratios of integral intensities of two characteristic peaks in alpha spectra of dextran-PAA films with adsorbed Pu from aqueous solution (**Figure S1**). Comparison between two approaches and neutral vs ionic forms of the PAA shell as three different dextran core sizes used in this study.

| Dextran core size | $I_{\text{Pu-242}}/I_{\text{Am-241}}$ |            |             |            |
|-------------------|---------------------------------------|------------|-------------|------------|
|                   | Approach 1                            |            | Approach 2  |            |
|                   | Neutral PAA                           | Ionic PAAC | Neutral PAA | Ionic PAAC |
| D20-PAA           | 0.9                                   | 1.25       | 0.77        | 1.6        |
| D70-PAA           | 0.7                                   | 1.97       | 0.45        | 1.85       |
| D500-PAA          | 0.56                                  | 1.4        | 0.5         | 1.3        |

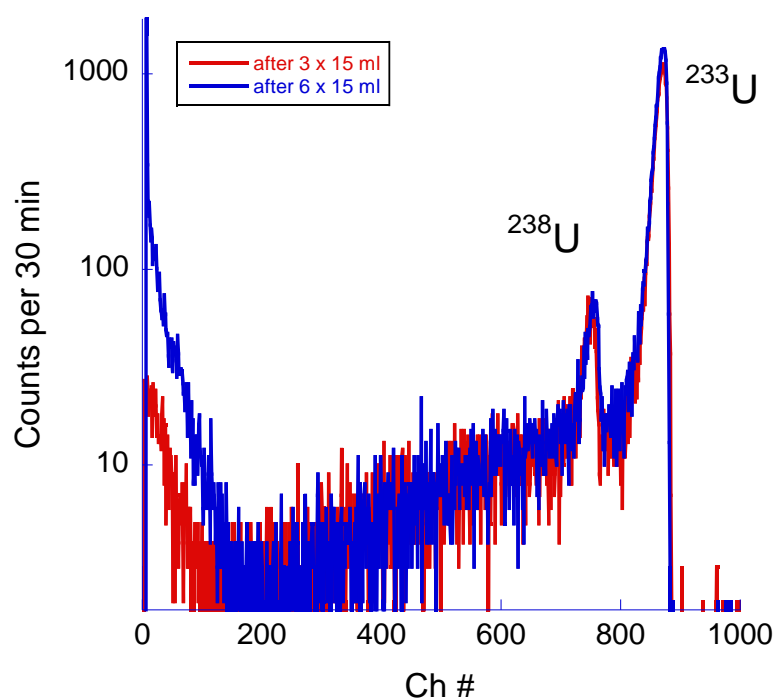

**Figure S2.** Alpha spectra of PVDF A6 membrane coated with D500-PAAC (1 mg) polymer after filtration of 3 x 15 ml and 6 x 15 ml volumes of 25 ppm U solutions. The membrane was dried after each filtration step in air and was additionally dried in vacuum after 3 and after 6 steps for alpha spectroscopy experiments.

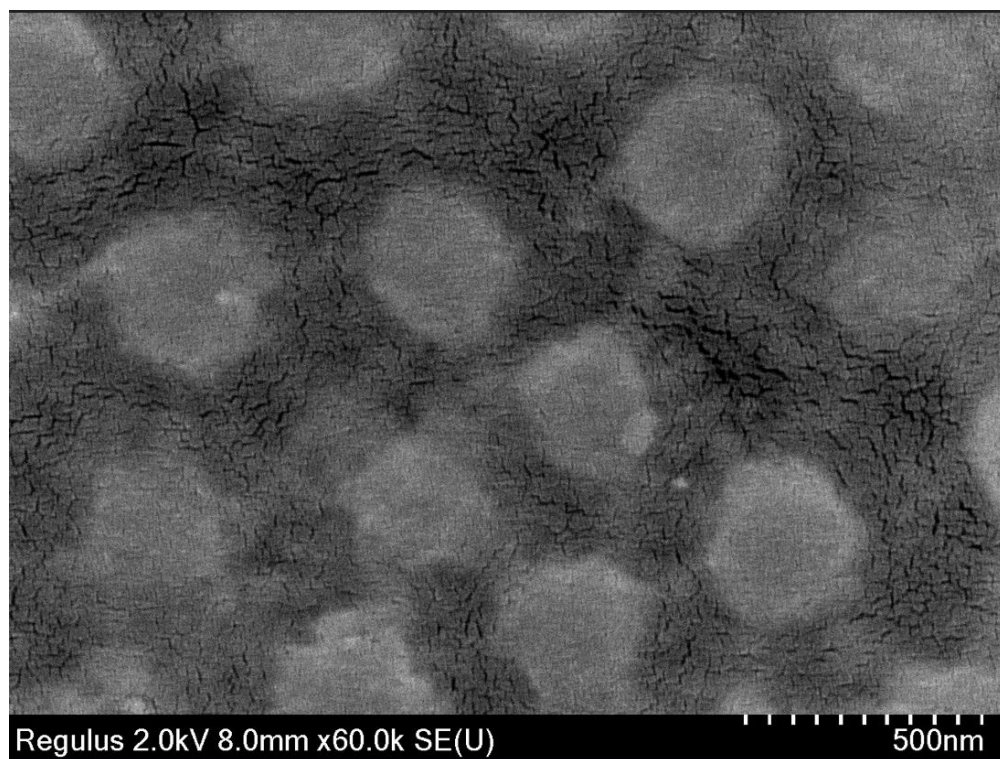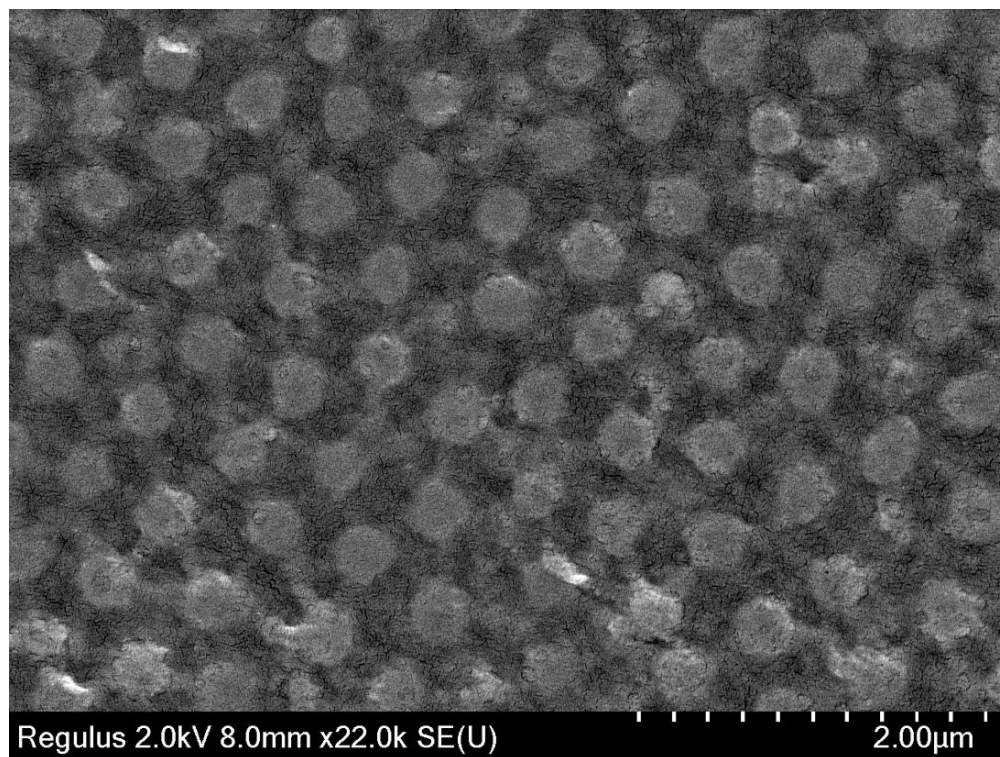

**Figure S3.** SEM images of supramolecular self-organization in D500-PAA film formed during pressure-assisted deposition on A6 PVDF UF membrane from water solution (Approach 1).
